# Supplementary material
Source: MDPI journal article supplement (https://www.mdpi.com/2073-4344/10/11/1236)
Supplement: s1 [file s1]

Supplementary Material

# Effect of the Solvent on the Basic Properties of Mg–Al Hydrotalcite Catalysts for Glucose Isomerization

Suna An, Dahye Kwon, JeongHyun Cho and Ji Chul Jung \*

Department of Chemical Engineering, Myongji University, Yongin 17058, Korea; suna960312@gmail.com (S.A.); kdahye829@gmail.com (D.K.); po78jhjh@gmail.com (J.H.C.)

\* Correspondence: jchung@mju.ac.kr

Received: 5 October 2020; Accepted: 23 October 2020; Published: date

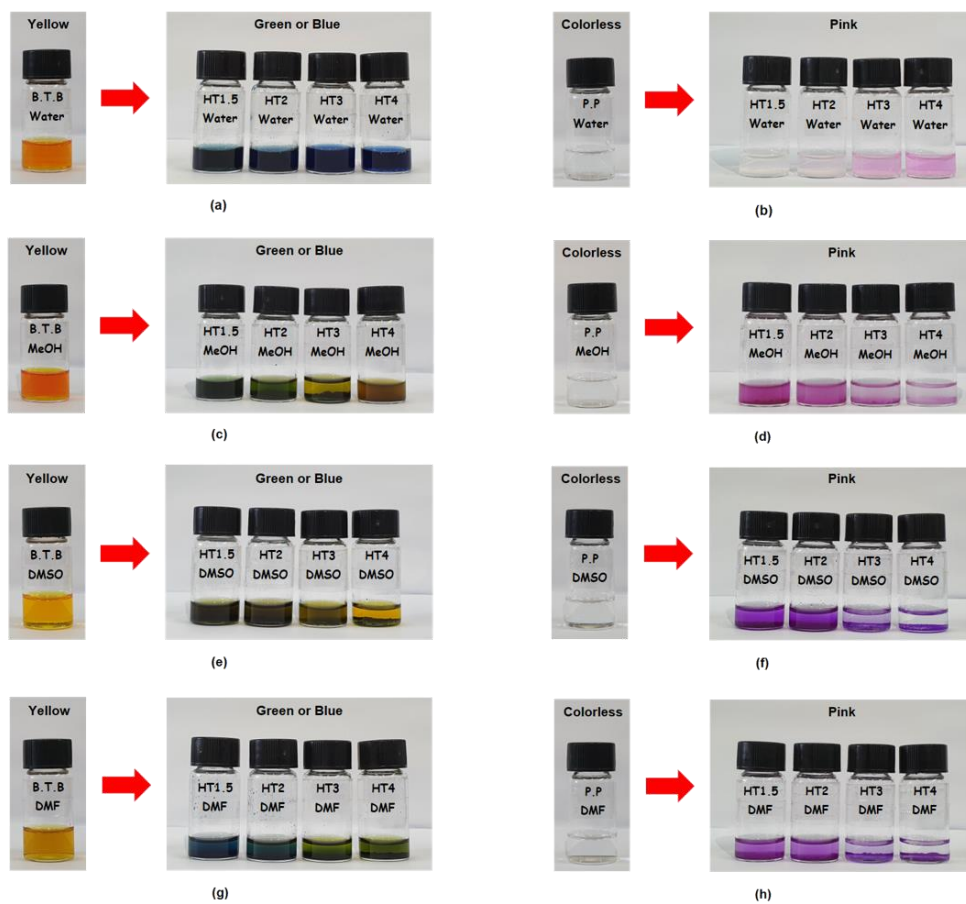

**Figure S1.** Hammett indicator method of prepared HTX catalyst ( $X=1.5, 2, 3,$  and  $4$ ): (a) Bromothymol blue ( $H_a=7.3$ ) in water, (b) Phenolphthalein ( $H_a=9.5$ ) in water, (c) Bromothymol blue ( $H_a=7.3$ ) in MeOH, (d) Phenolphthalein ( $H_a=9.5$ ) in MeOH, (e) Bromothymol blue ( $H_a=7.3$ ) in DMSO, (f) Phenolphthalein ( $H_a=9.5$ ) in DMSO, (g) Bromothymol blue ( $H_a=7.3$ ) in DMF, (h) Phenolphthalein ( $H_a=9.5$ ) in DMF.
